# Supplementary material for: Convergence of IL-1β and VDR Activation Pathways in Human TLR2/1-Induced Antimicrobial Responses
Source: PubMed Central journal article supplement (PMC2686169; doi:10.1371/journal.pone.0005810), 2009-06-05
Supplement: pone.0005810.s001.pdf [file pone.0005810.s001.pdf]

Figure S1

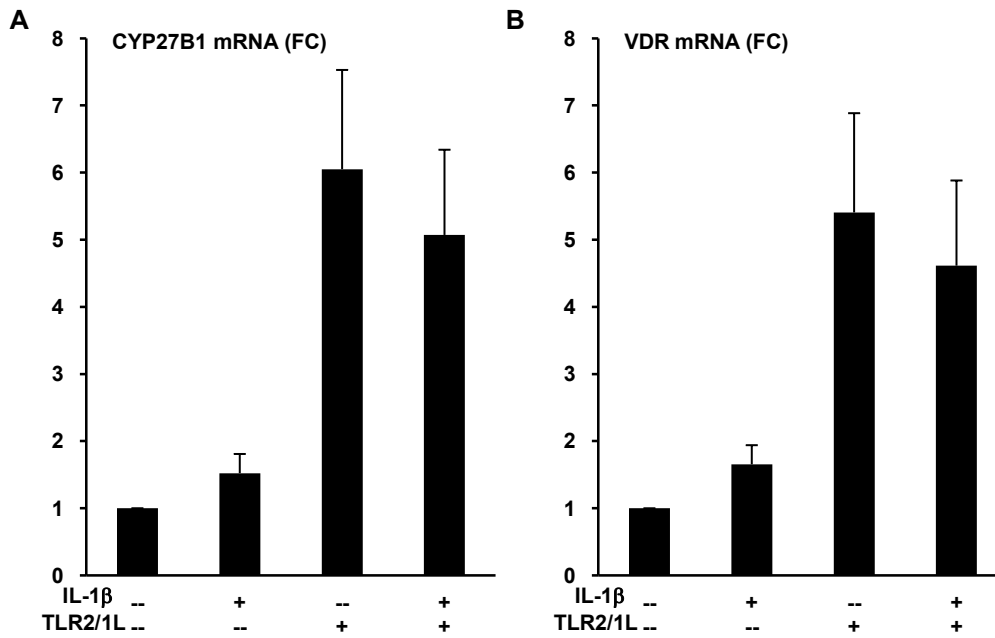

Figure S1. Monocytes stimulated with either media, TLR2/1L (10  $\mu$ g/ml), recombinant IL-1 $\beta$  (10 ng/ml) or both for 24 hours. Levels of (A) CYP27B1 or (B) VDR mRNA were determined using qPCR (mean fold change vs media  $\pm$  SEM, n = 5).
